# Supplementary material
Source: Springer Nature journal article supplement (https://www.springermedizin.de/resource/supplementary/12885_2009_2471_MOESM8_ESM.pdf/9461388)

PC3-mock

PC3-AKR1C3 C1

PC3-AKR1C3 C1  
+  
20  $\mu$ M AG1024

PC3-AKR1C3 C1  
+  
10  $\mu$ M LY294002

VEGF A<sub>189</sub>

VEGF A<sub>165</sub>

VEGF A<sub>121</sub>

VEGF B<sub>186</sub>

VEGF B<sub>167</sub>

VEGF C

VEGF D

$\beta$ -actin

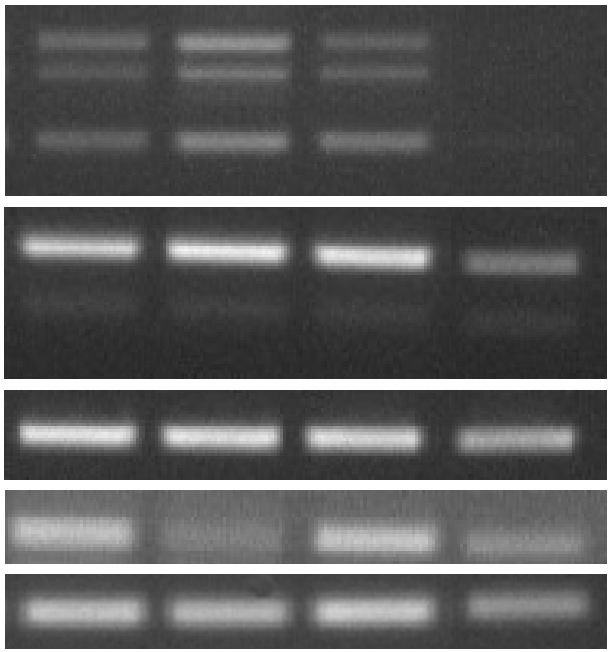

Supplement: MOESM8 [file 9461388]
